# Supplementary material for: Study on the structure–performance relationship of nonlinear optical chromophores with different donors, bridges, and acceptors
Source: Royal Society of Chemistry journal article supplement (doi:10.1039/d4nj00922c), 2024-01-01
Supplement: d4nj00922c1.pdf [file d4nj00922c1.pdf]

## ***Supporting Information***

### **Study on structure-performance relationship of nonlinear optical chromophore with different donors, bridges and acceptors**

Weijun Zhang <sup>a#</sup>, Ziheng Li <sup>a#</sup>, Fuyang Huo <sup>a\*</sup>, Wenlong He <sup>a</sup>, Jiahai Wang <sup>a\*</sup>, Yu Zhang <sup>a</sup>, Chuying Liu <sup>a</sup> and Fenggang Liu <sup>a\*</sup>

<sup>a</sup>*School of Chemistry and Chemical Engineering, Guangzhou University, Guangzhou 510006, P. R. China. E-mail address: liufg6@gzhu.edu.cn*

#### **Table of Contents**

|                                                    |    |
|----------------------------------------------------|----|
| 1. UV-Vis Absorption Spectroscopy.....             | 2  |
| 2. DFT Calculations.....                           | 3  |
| 3. Properties of similar organic EO materials..... | 3  |
| 4. NMR pictures.....                               | 5  |
| 5. References.....                                 | 12 |

# 1. UV-Vis Absorption Spectroscopy

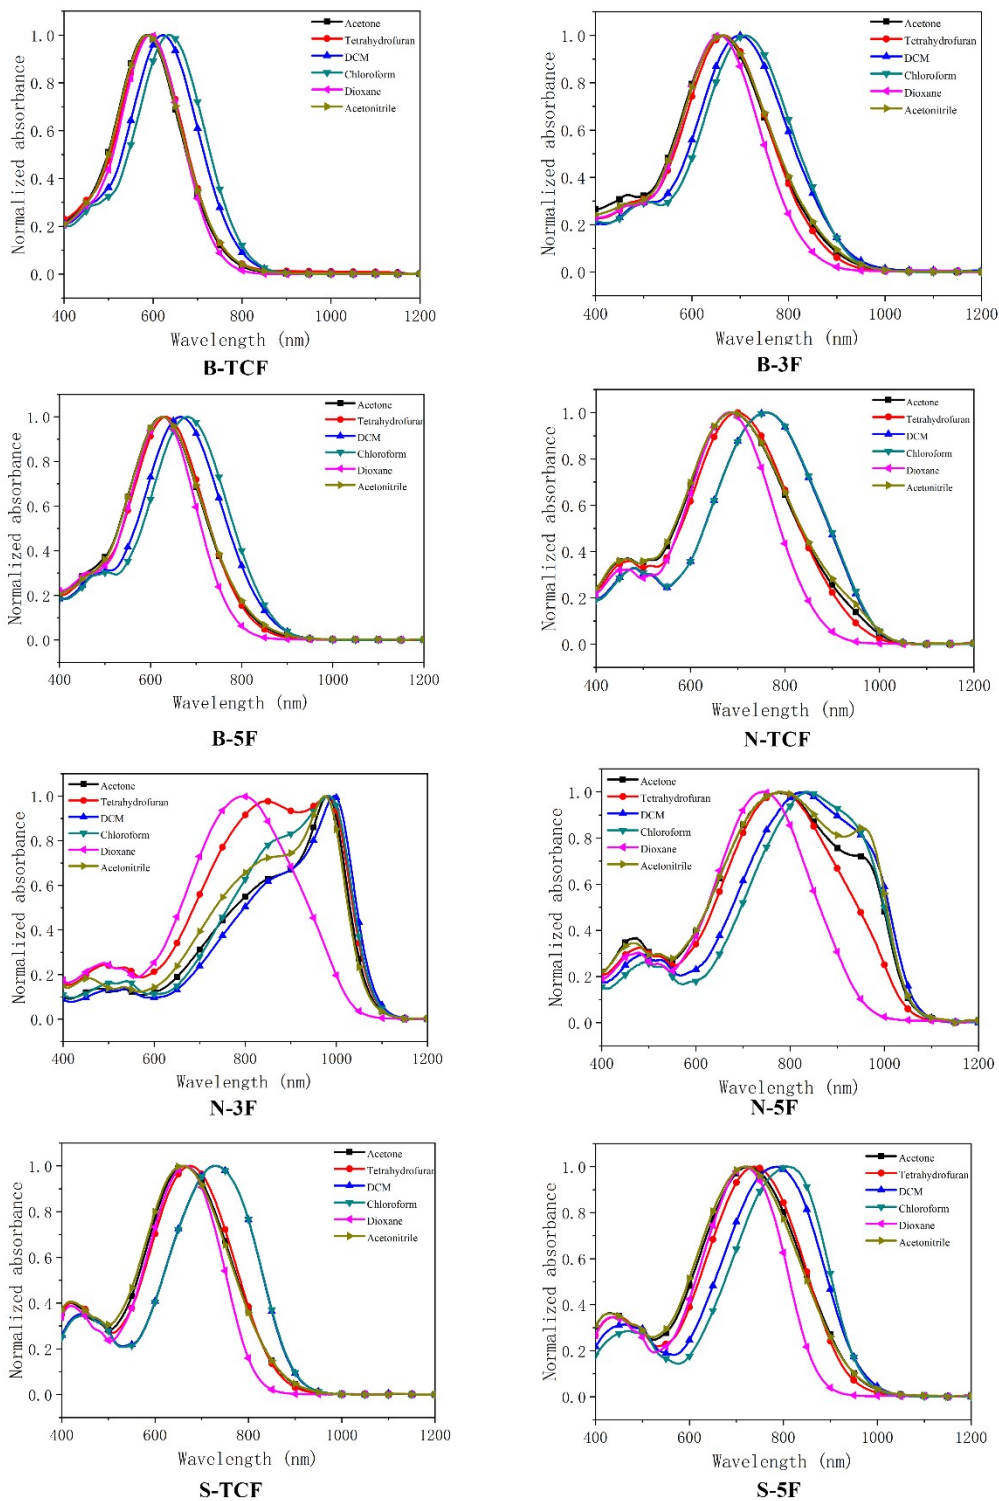

**Figure S1.** Normalized UV-Vis absorption spectra of the eight chromophores in six aprotic solvents with varying dielectric constants ( $\epsilon$ )

## 2. DFT Calculations

**Table S1**  $\beta$  value of chromophores in vacuum and solvents

| Cmpd  | Vac <sup>a</sup> | Thf <sup>b</sup> | Tol <sup>c</sup> | Chl <sup>d</sup> |
|-------|------------------|------------------|------------------|------------------|
| B-TCF | 888              | 3617             | 2347             | 3186             |
| B-3F  | 1016             | 2553             | 1712             | 2274             |
| B-5F  | 996              | 2310             | 1538             | 1942             |
| N-TCF | 1214             | 4648             | 2835             | 4003             |
| N-3F  | 1405             | 4161             | 2639             | 3636             |
| N-5F  | 1342             | 2993             | 1982             | 2655             |
| S-TCF | 905              | 4131             | 2355             | 3483             |
| S-3F  | 1047             | 3279             | 2066             | 2857             |
| S-5F  | 1042             | 2470             | 1748             | 2238             |

<sup>abcd</sup> was the first-order hyperpolarizability in vacuum 、 tetrahydrofuran 、 chloroform and toluene calculated from DFT calculations.

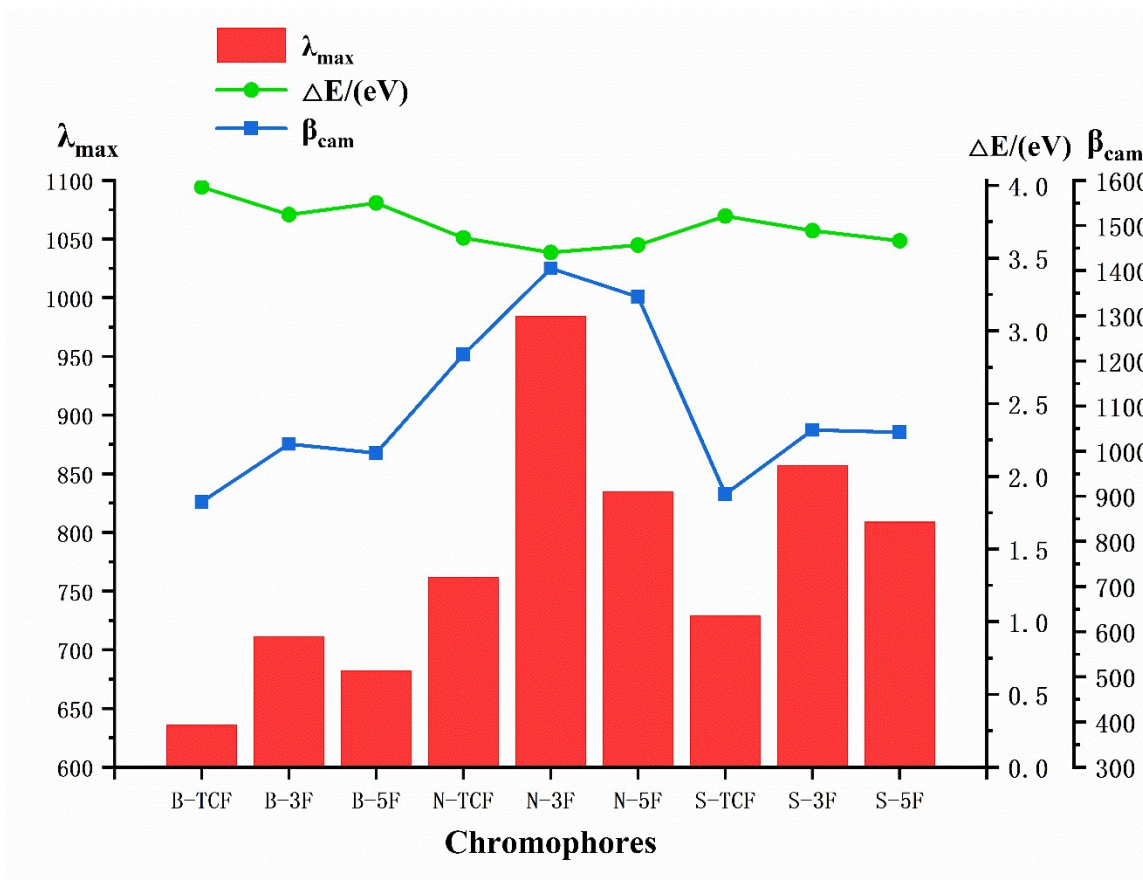

**Figure S2.** The relationship between  $\lambda_{\max}$  、  $\Delta E$  and  $\beta_{\text{cam}}$  of the nine chromophores

## 3. Properties of similar organic EO materials

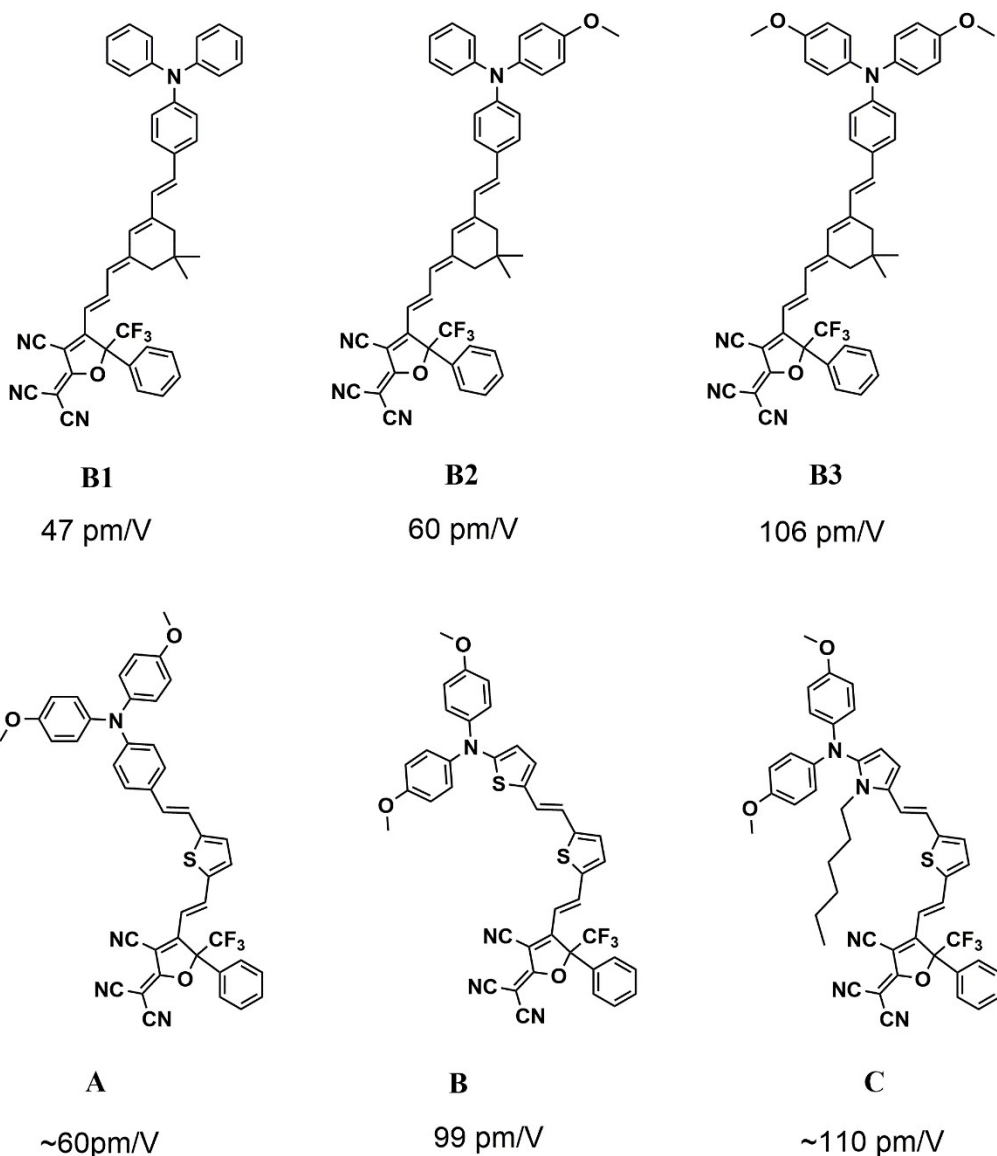

**Figure S3. Chemical structures of the similar organic EO materials.<sup>1,2</sup>**

Supplementary Table S3 summarizes the properties of the reported similar organic EO materials, including the chromophore B1-B3 with triphenylamine as the donor and the chromophore A-C with thiophene derivatives as the donor. The chromophores B-3F and S-3F have very similar structures to the reported chromophores B1 and B, and their electro-optical coefficients were also similar. Compared to chromophore B1, chromophore B-3F had a larger electro-optic coefficient, mainly due to the steric hindrance groups on the electron bridge. The N series of chromophores in this paper had a larger electro-optic coefficient than the reported chromophores A-C, because the N series of isophorone electron bridges on N series of chromophores have better electron transfer ability than thiophene bridges, resulting in a larger first-order hyperpolarizability.

#### 4. NMR pictures

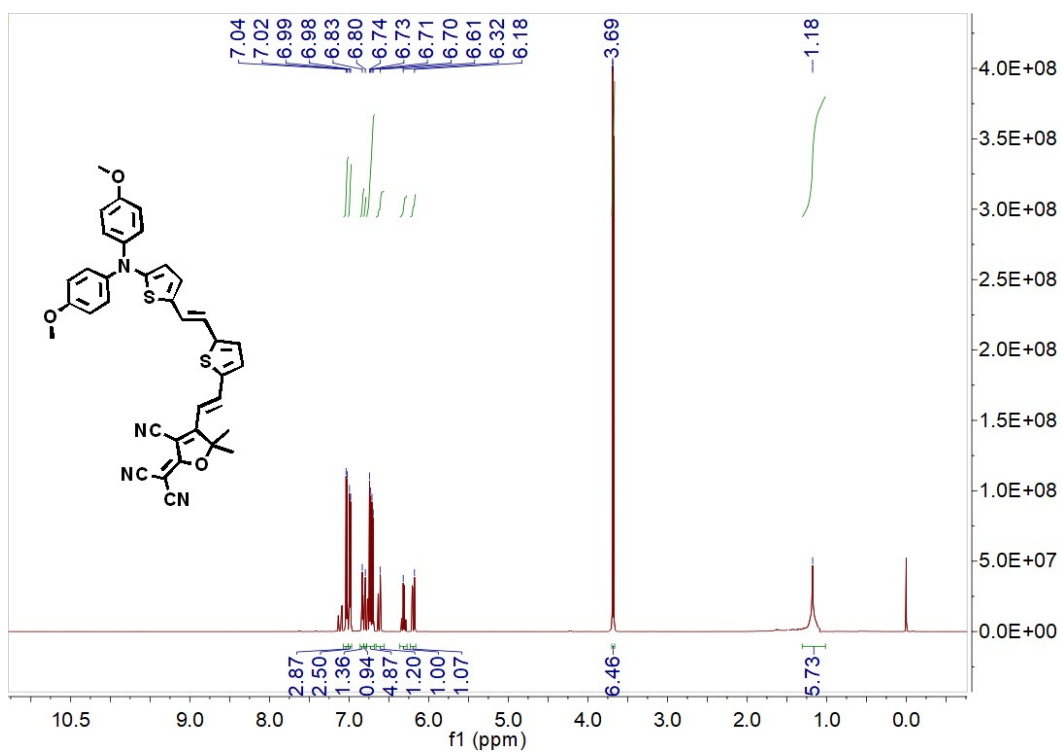

Figure S4. <sup>1</sup>H-NMR spectrum of S-TCF.

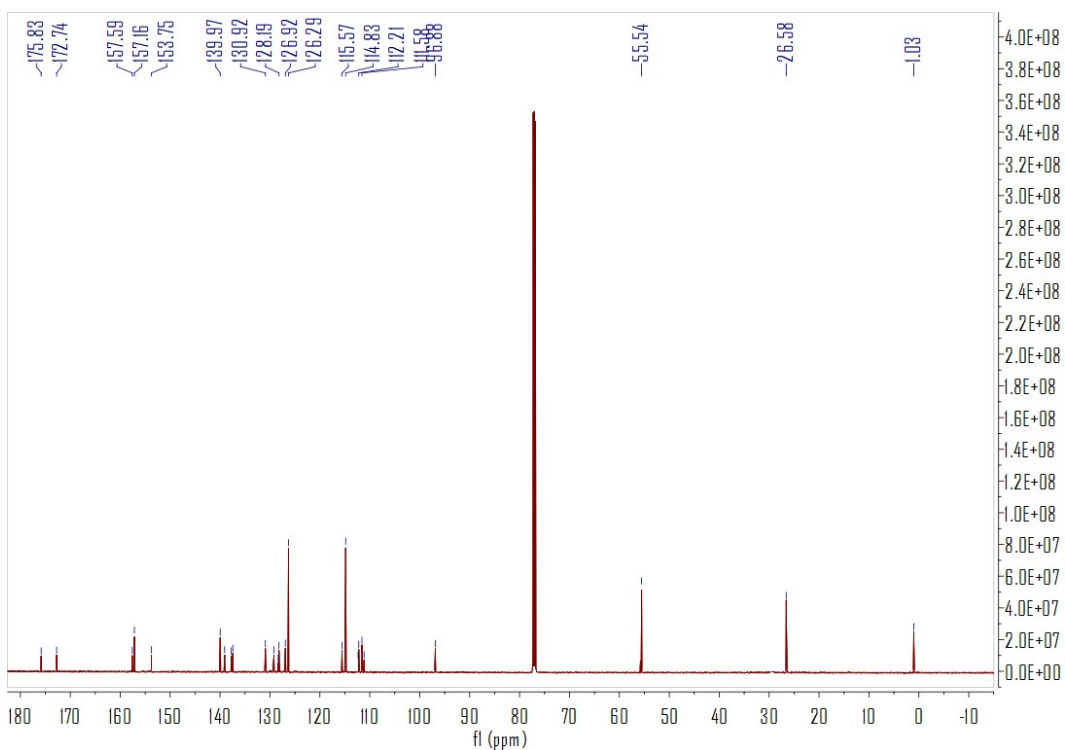

Figure S5.  $^{13}\text{C}$ -NMR spectrum of S-TCF.

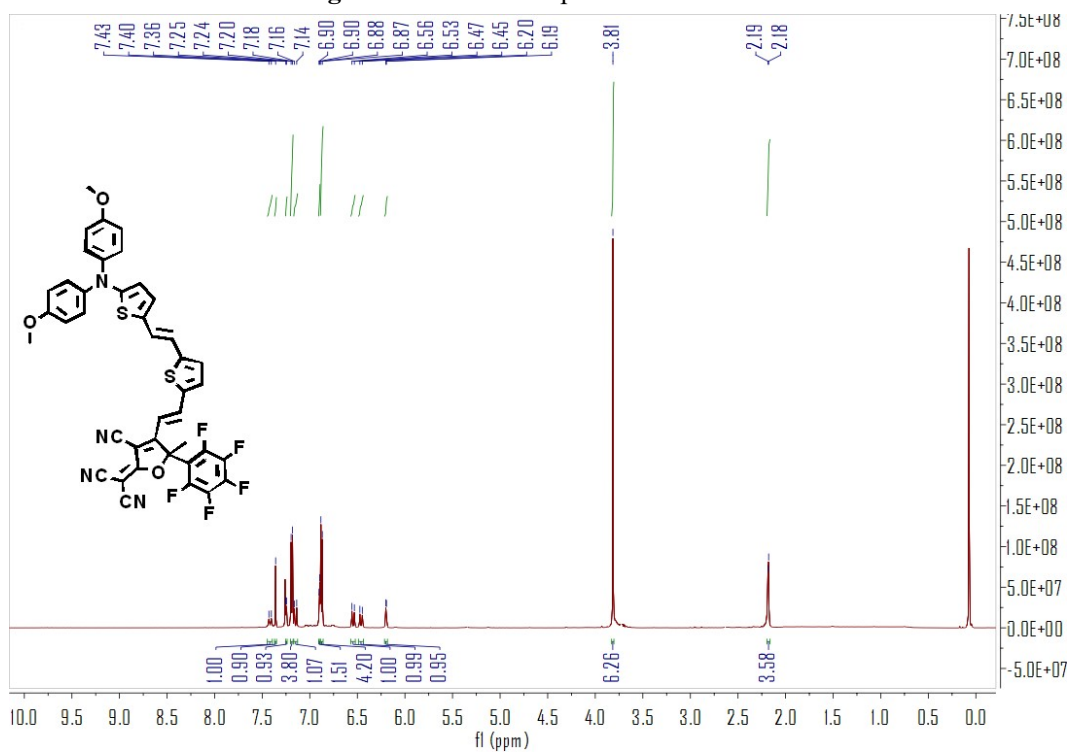

Figure S6.  $^1\text{H}$ -NMR spectrum of S-5F.

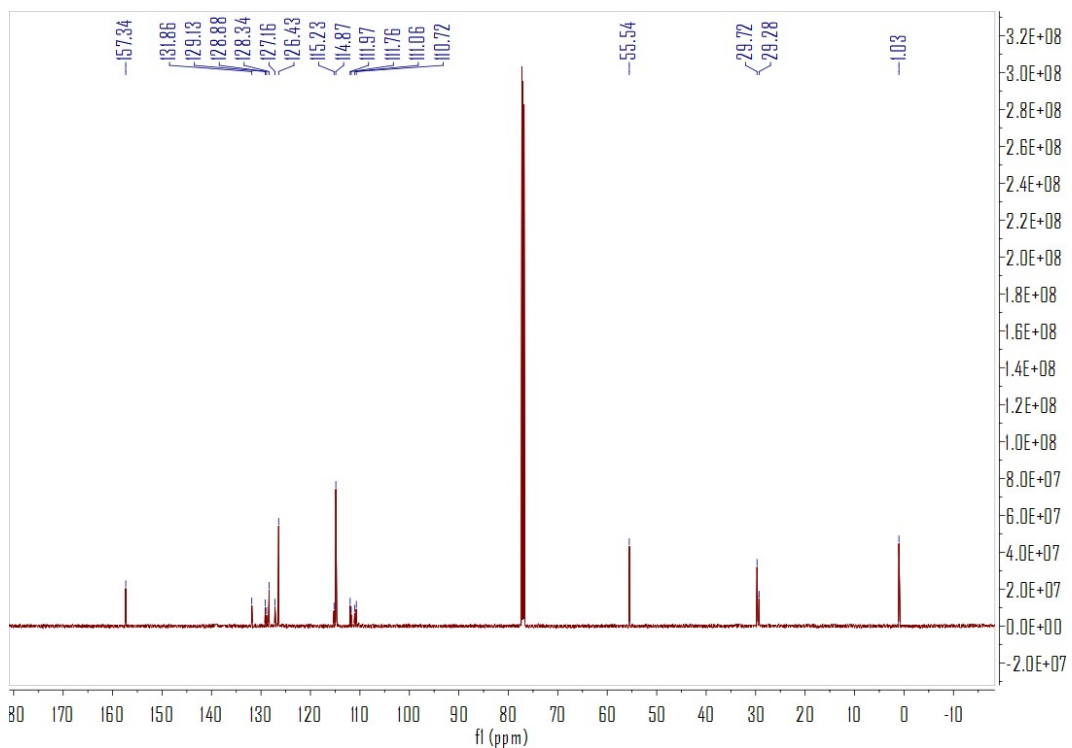

Figure S7.  $^{13}\text{C}$ -NMR spectrum of S-5F.

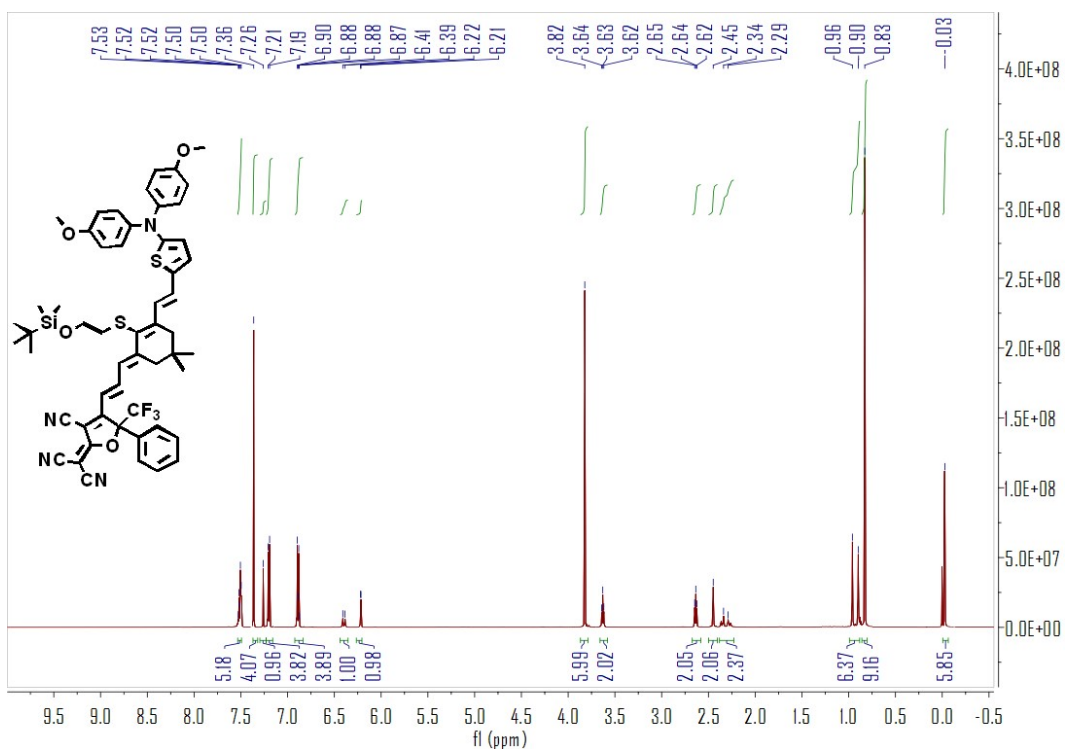

Figure S8. <sup>1</sup>H-NMR spectrum of N-3F.

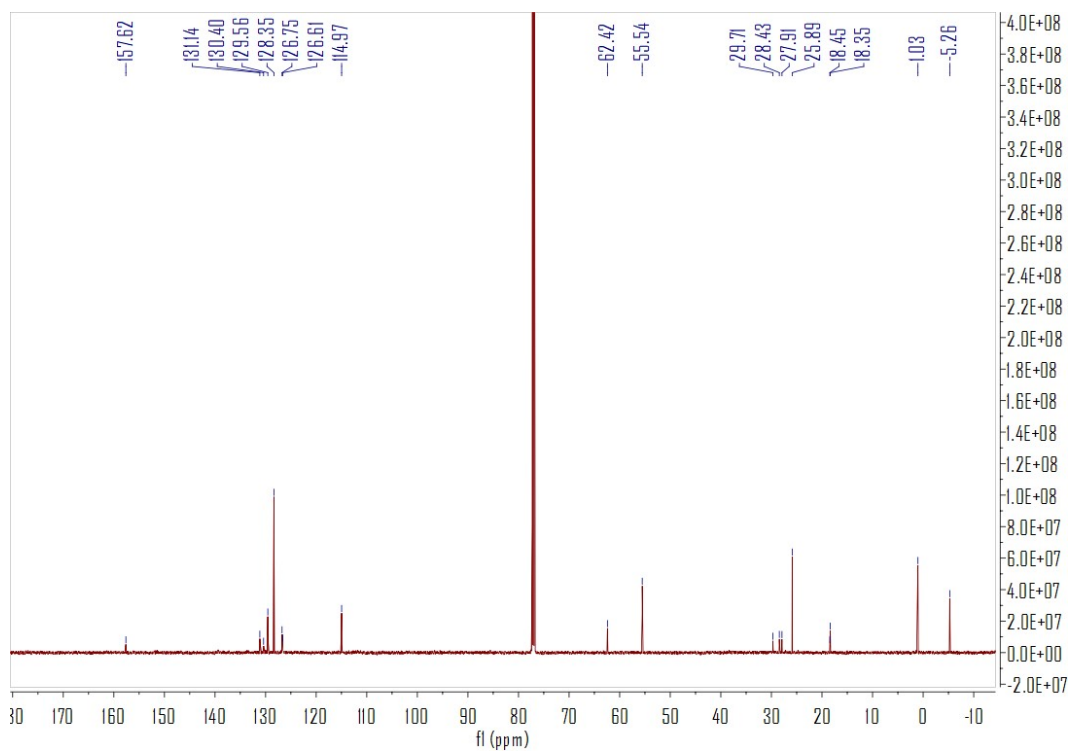

Figure S9. <sup>13</sup>C-NMR spectrum of N-3F.



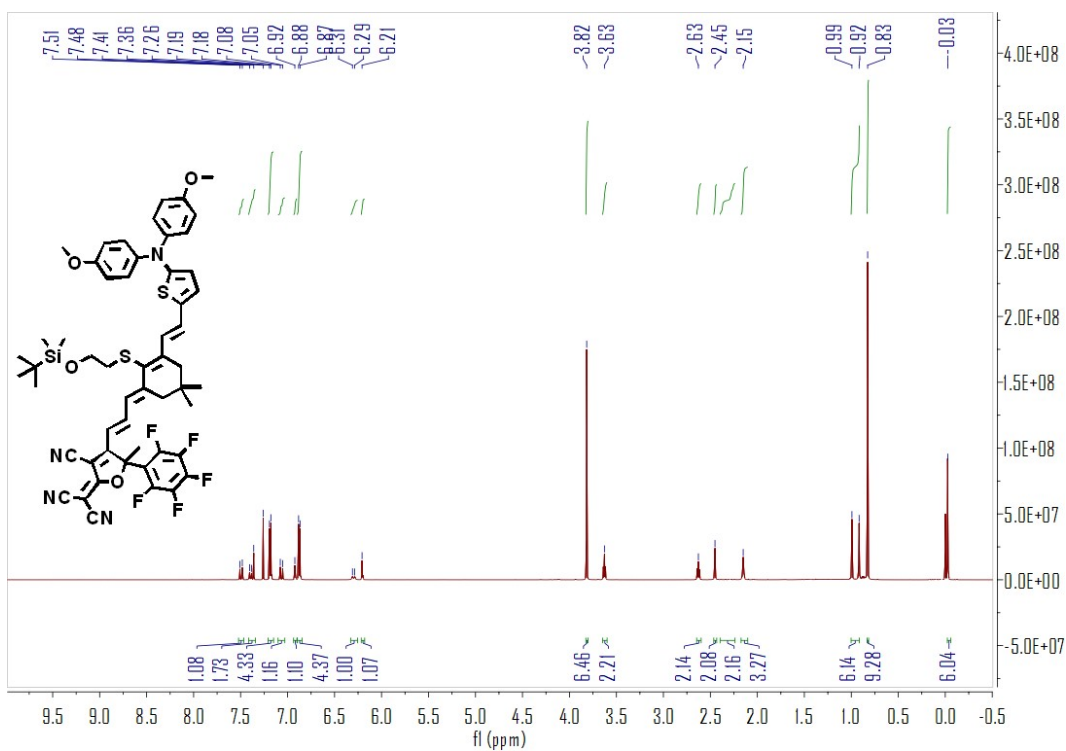

Figure S10. <sup>1</sup>H-NMR spectrum of N-5F.

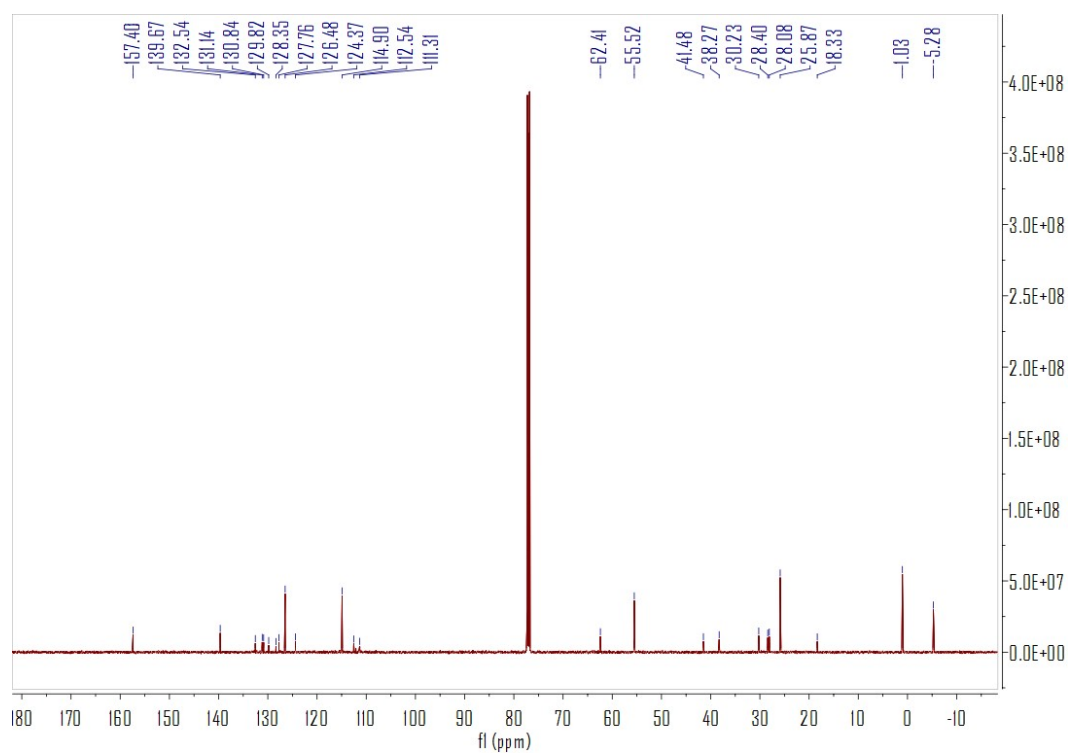

Figure S11. <sup>13</sup>C-NMR spectrum of N-5F.



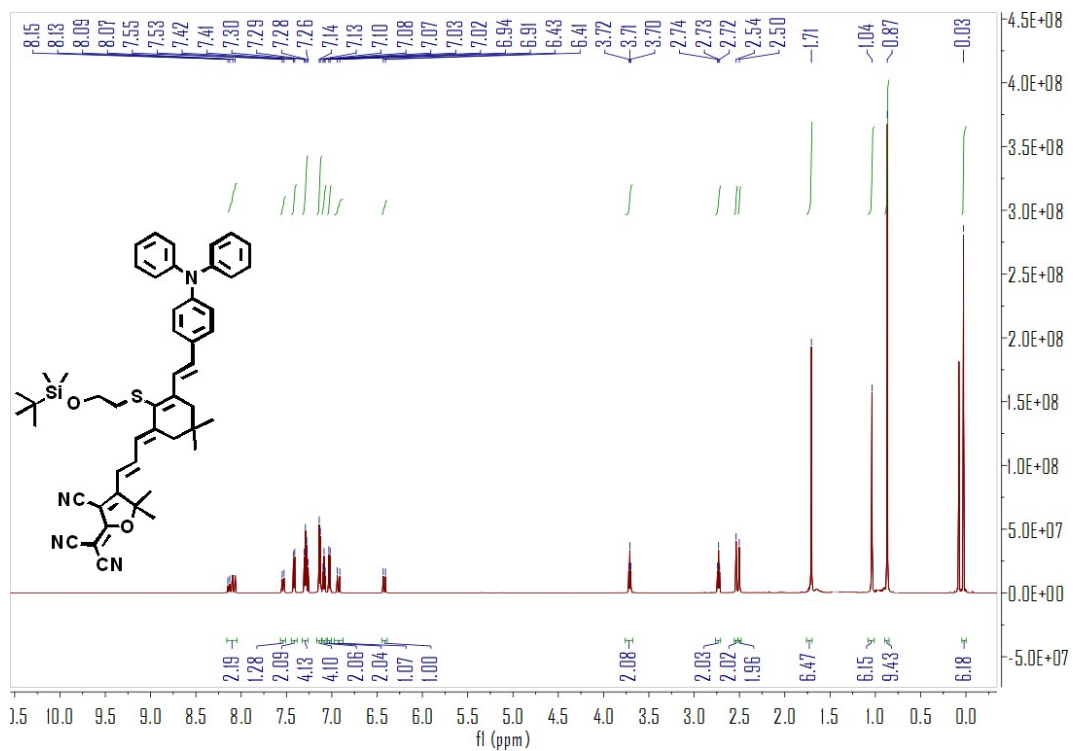

Figure S12.  $^1\text{H-NMR}$  spectrum of B-TCF.

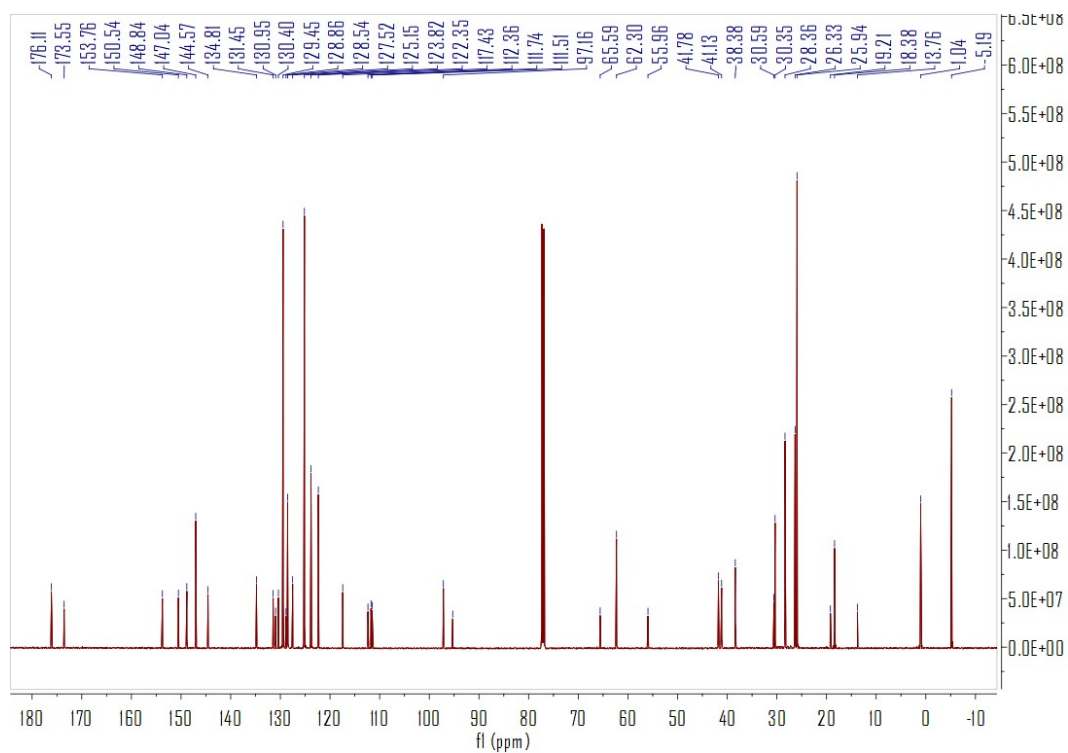

Figure S13.  $^{13}\text{C-NMR}$  spectrum of B-TCF.

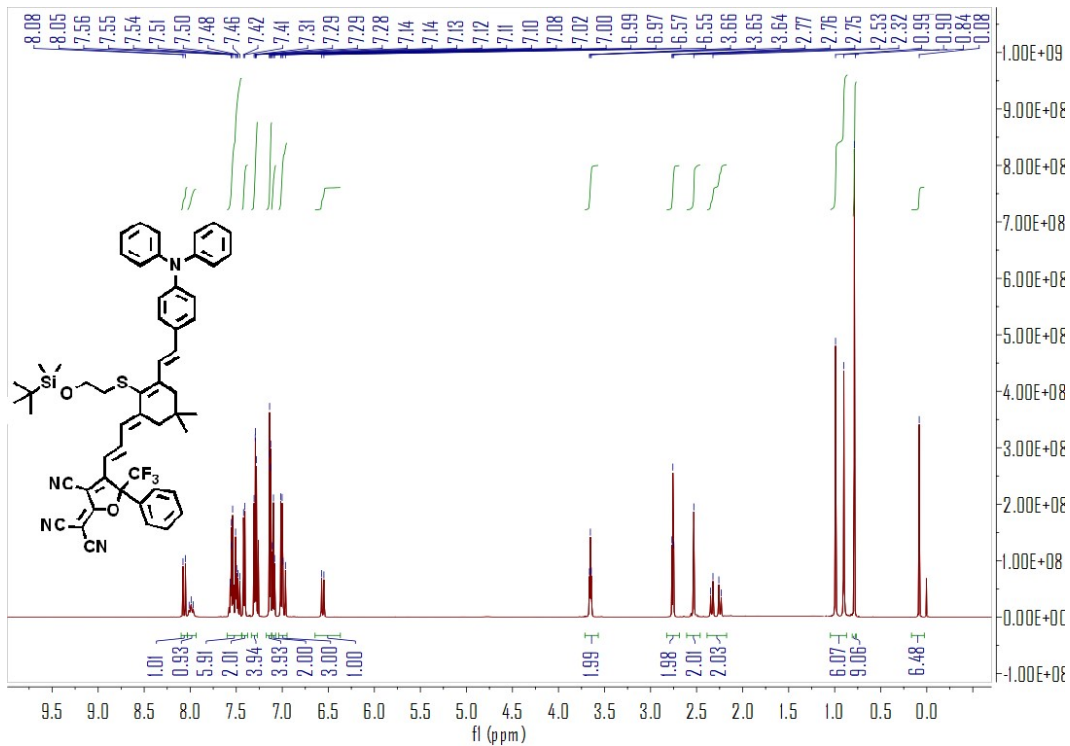

Figure S14. <sup>1</sup>H-NMR spectrum of B-3F.

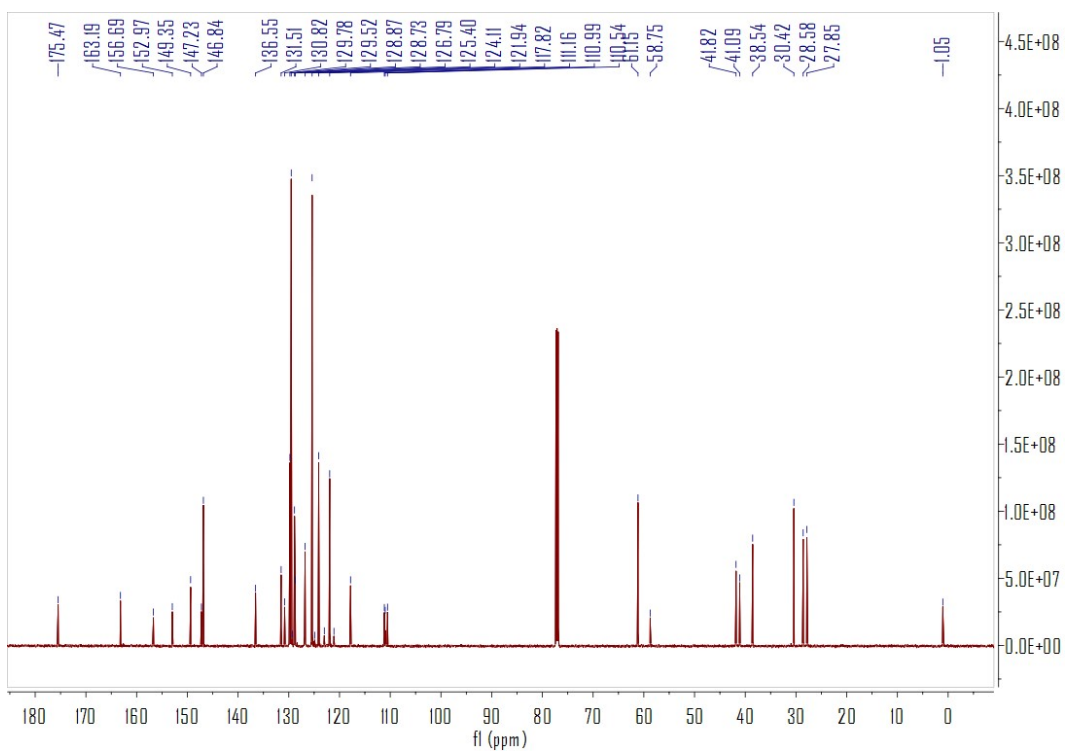

Figure S15. <sup>13</sup>C-NMR spectrum of B-3F.

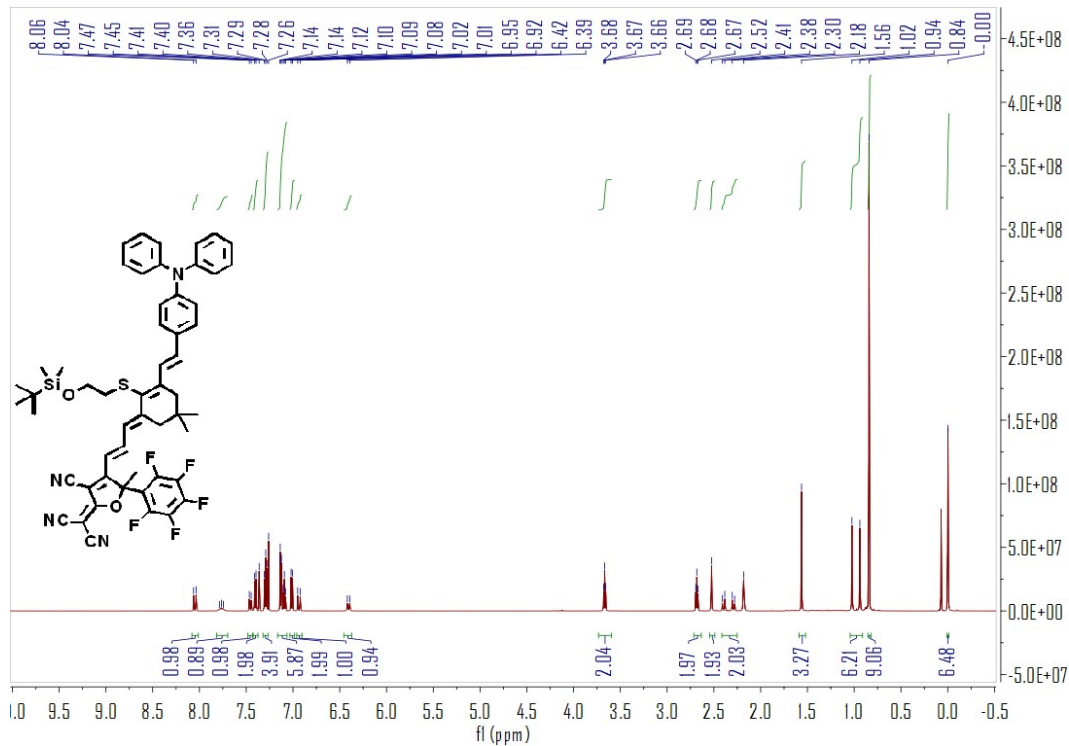

Figure S16.  $^1\text{H}$ -NMR spectrum of B-5F.

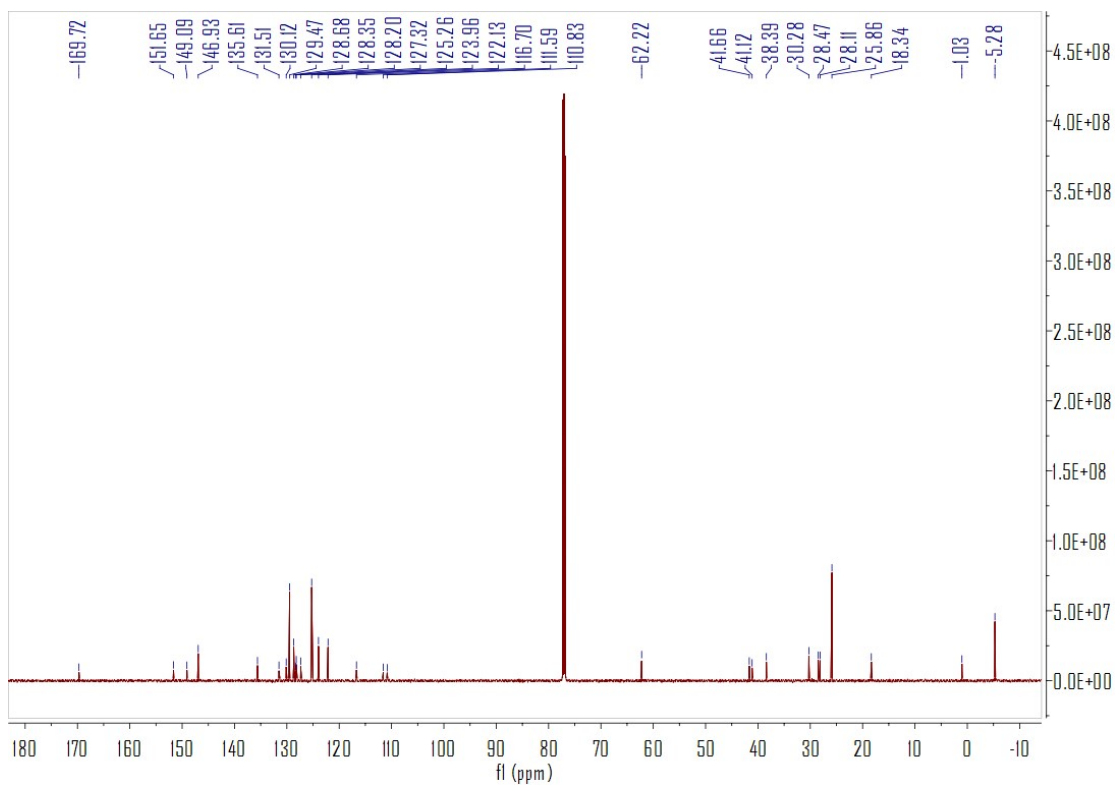

Figure S17.  $^{13}\text{C}$ -NMR spectrum of B-5F.

## 5. References

1. J. A. Davies, A. Elangovan, P. A. Sullivan, B. C. Olbricht, D. H. Bale, T. R. Ewy, C. M. Isborn, B. E. Eichinger, B. H. Robinson, P. J. Reid, X. Li and L. R. Dalton, *Journal of the American Chemical Society*, 2008, **130**, 10565-10575.
2. Y.-J. Cheng, J. Luo, S. Hau, D. H. Bale, T.-D. Kim, Z. Shi, D. B. Lao, N. M. Tucker, Y. Tian, L. R. Dalton, P. J. Reid and A. K. Y. Jen, *Chemistry of Materials*, 2007, **19**, 1154-1163.
